# Supplementary material for: A selective fluorescent probe for an organophosphorous nerve agent mimic via an oxime-to-isoxazole cascade reaction
Source: Royal Society of Chemistry journal article supplement (doi:10.1039/d5ra08944a), 2026-01-01
Supplement: d5ra08944a1.pdf [file d5ra08944a1.pdf]

## Supporting Information (SI)

*for*

### **A Selective Fluorescent Probe for Organophosphorous Nerve Agents mimic via an Oxime-to-Isoxazole Cascade Reaction**

**Muhammad Shar Jhahan Khan,<sup>a</sup> K. S. Al-Namshah,<sup>b</sup> Muhammad Saleem,<sup>c</sup> and Ya-Wen Wang<sup>d</sup>**

<sup>a,c</sup>Department of Chemistry, Ghazi University, Dera Ghazi Khan 32200, Pakistan

<sup>b</sup>Department of Chemistry, Imam Mohammad Ibn Saud Islamic University, Riyadh 11623, Saudi Arabia

<sup>c</sup>School of Chemistry, Southwest Jiaotong University, Chengdu 611756, Sichuan, P. R. China

**Keywords:** Detection, Nerve Agents, Fluorescence Sensors, Chemical Warfare Agents, Oxime-Isoxazole, Limit of Detection, Sensitivity.

## Table of Contents

|                                                                                                                                                                                                   |    |
|---------------------------------------------------------------------------------------------------------------------------------------------------------------------------------------------------|----|
| 1. Synthesis of Fluorescein Monoaldehyde, <b>1</b> and <b>2</b> .....                                                                                                                             | 3  |
| 2. Synthesis of Fluorescein Monoaldehyde .....                                                                                                                                                    | 3  |
| 3. Synthesis of <b>1</b> .....                                                                                                                                                                    | 3  |
| 4. Synthesis of <b>2</b> .....                                                                                                                                                                    | 4  |
| 5. Types of Nerve Agents.....                                                                                                                                                                     | 5  |
| 6. Mechanism.....                                                                                                                                                                                 | 5  |
| 7. Characterization, <sup>1</sup> H NMR, <sup>13</sup> C NMR, MS spectrum of monoaldehyde-functionalized fluorescein, <b>1</b> and <b>2</b> , Optimized structures of <b>1</b> and <b>2</b> ..... | 6  |
| 8. Crystal data and structure refinement parameters for <b>2</b> .....                                                                                                                            | 19 |
| 9. Limit of Detection (LOD).....                                                                                                                                                                  | 20 |
| 10. pH Effect .....                                                                                                                                                                               | 21 |
| 11. Effect of HCl on UV/Fluorescence Spectra .....                                                                                                                                                | 21 |
| 12. Applications.....                                                                                                                                                                             | 22 |
| 13. Crystalline Structure.....                                                                                                                                                                    | 23 |
| 14. DFT Calculations.....                                                                                                                                                                         | 23 |
| 15. References.....                                                                                                                                                                               | 25 |

## Synthesis of Fluorescein Monoaldehyde, 1 and 2

The synthesis procedure was adopted from known literature.<sup>1</sup> In a 500ml three neck flask, fluorescein (5.0g, 15.0mmol) was added along with 12ml methanol at room temperature. Then mixture was kept cold at 0.0 °C followed by the addition of NaOH (40.0g, 50%). 15-crown-5 (60  $\mu$ L) within 5 minutes and stirred for 10 minutes at this temperature and after that mixture was allowed to warm gradually.  $\text{CH}_3\text{Cl}$  (20.0 ml) was added drop wise while the temperature of the mixture was kept 55 °C. After that reaction mixture was stirred for 10.0 hours at 55 °C and then allowed to cold at room temperature. Then the reaction mixture was acidified with  $\text{H}_2\text{SO}_4$  (15ml, 10.0M). Purple-black precipitates were obtained which were separated by column chromatographic technique (using DCM/EtOAc 85:15). Finally, pale yellow precipitates were obtained which could be re-crystallized in acetone.

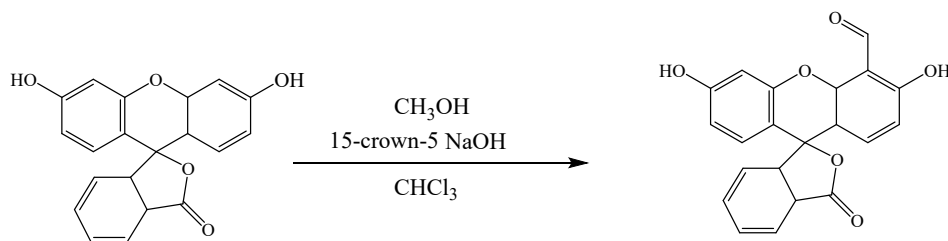

**Scheme S1** Synthesis of fluorescein monoaldehyde.

The synthesis procedure was adopted from known literature.<sup>2</sup> Hydroxylamine hydrochloride (206 mg, 3 mmol) was added to 5 mL of ethanol and stirred at room temperature for 10 minutes. After dissolving, Fluorescein monoaldehydes (720 mg, 2 mmol) were dissolved in 10 mL of ethanol and added dropwise to the solution. After 5 minutes, add room temperature and stir for 22 hours. The reaction was stopped and the solvent was removed by steaming. The resulting crude product was separated by column chromatography using dichloromethane and ethyl acetate (DCM:EA=7:1,v:v) Make the eluent and collect the product point. DCM:EA=7:1, v:v,  $R_f$ =0.21;  $\text{CHCl}_3$ :MeOH=10:1, v:v,  $R_f$ =0.51), A yellow solid powder was obtained. (479.6 mg, 64 %) . Mp: 274-276 °C.  $^1\text{H}$  NMR ( $\text{DMSO}-d_6$ , 400 MHz)  $\delta$  = 11.92 (s, 1H), 11.10 (s, 1H), 10.20 (s, 1H), 8.86 (s, 1H), 8.00 (d,  $J$  = 7.6 Hz, 1H), 7.80 (t,  $J$  = 6.8 Hz, 1H), 7.72(t,  $J$  = 7.2 Hz, 1H), 7.30 (d,  $J$  = 7.6 Hz, 1H), 6.86 (d,  $J$  = 2.0 Hz, 1H), 6.69 (d,  $J$  = 9.2 Hz, 1H), 6.64(d,  $J$  = 8.8 Hz, 1H), 6.61-6.56 (m, 2H) ppm.  $^{13}\text{C}$  NMR (75 MHz,  $\text{DMSO}-d_6$ )  $\delta$  (ppm): 169.1, 160.0, 159.1, 152.7, 151.8, 149.5, 145.9, 136.1, 130.7, 130.3, 129.4, 126.2, 125.1, 124.5, 113.6, 113.1, 110.4, 109.8, 105.5, 103.1, 83.1. ESI-MS:  $m/z$  375.4  $[\text{M} + \text{H}]^+$ .

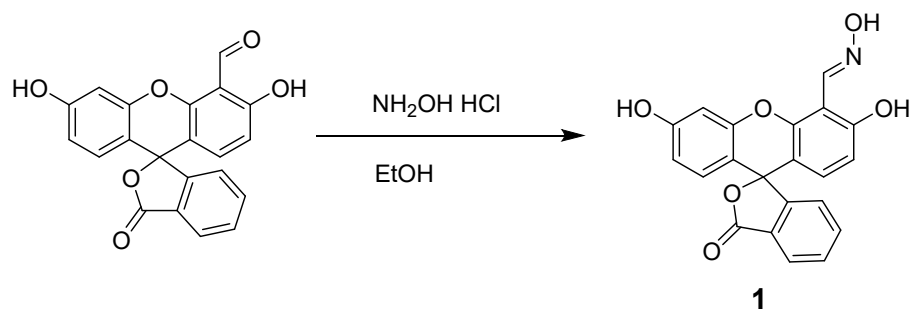

**Scheme S2** Synthesis of probe.

The synthesis procedure was adopted from known literature.<sup>3</sup> 2: Synthesis of Compound **1** (187.5 mg, 0.5 mmol) and p-toluenesulfonyl chloride (143 mg, 0.75 mmol) were added to 3 mL of acetonitrile, After stirring at room temperature for 10 minutes, triethylamine (88.5 uL, 0.64 mmol) was added dropwise with a micro-syringe, After 2 min addition, the mixture was stirred at room temperature for 5.5 hours. The reaction was quenched and the solvent was removed by steaming. The resulting crude product was separated by column chromatography, the eluent was washed with dichloromethane and ethyl acetate (DCM: EA = 25: 1, v: v) to give a pale yellow solid. (94.1 mg, 52.7 %. Mp: 282-284. <sup>1</sup>H NMR (DMSO-*d*<sub>6</sub>, 400 MHz)  $\delta$  =10.33 (s, 1H), 9.64(s, 1H), 8.05 (d, *J* = 7.6 Hz, 1H), 7.80 (t, *J* = 7.6 Hz, 1H), 7.74 (t, *J* = 7.2 Hz, 1H), 7.50(d, *J* = 8.8 Hz, 1H ), 7.32(d, *J* = 7.2 Hz, 1H), 7.02(d, *J* = 9.2 Hz, 1H), 6.83(d, *J* = 1.6 Hz, 1H), 6.68-6.63(m, 2H) ppm. <sup>13</sup>C NMR (75 MHz, DMSO-*d*<sub>6</sub>)  $\delta$  (ppm): 169.0, 163.8, 160.1, 153.2, 151.2, 145.2, 136.3, 131.2, 130.8, 129.8, 126.1, 125.3, 124.6, 114.2, 113.3, 111.6, 109.7, 106.6, 102.8, 82.2. ESI-MS: *m/z* 358.2 [M + H]<sup>+</sup>.

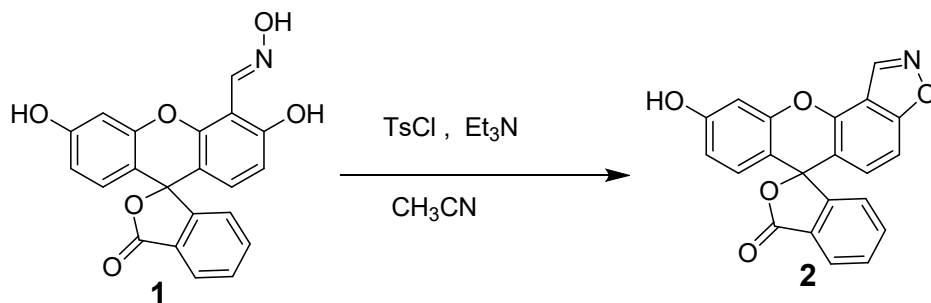

**Scheme S3** Synthesis of compound **2**.

## Types of Nerve Agents

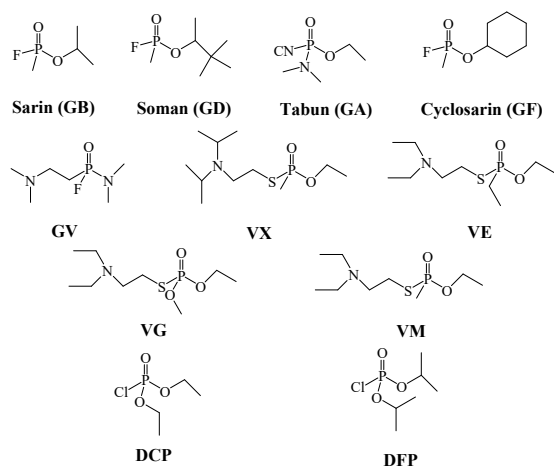

**Figure S1** Chemical Warfare Agents and their Mimics

## Mechanism

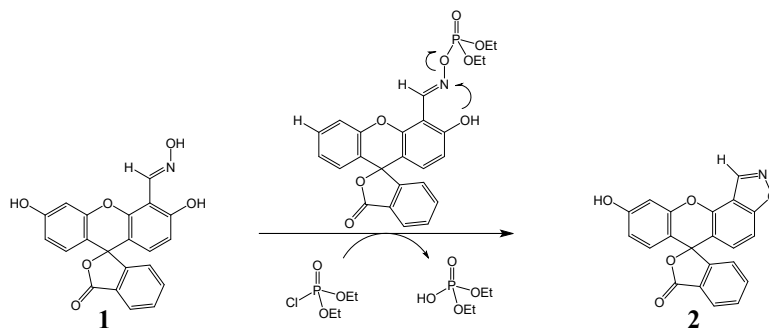

**Scheme S4** Mechanism for the reaction of DCP with compound **1** to yield **2**.

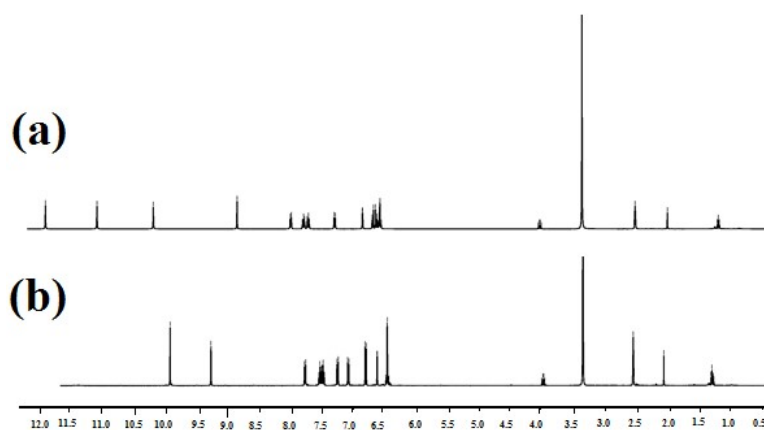

**Figure S2** <sup>1</sup>H NMR spectra of (a) **1**, (b) **2**, in DMSO-d<sub>6</sub>.

## Characterization

$^1\text{H}$  NMR,  $^{13}\text{C}$  NMR, MS spectrum of monoaldehyde-functionalized fluorescein, **1** and **2**,  
Optimized structures of **1** and **2**.

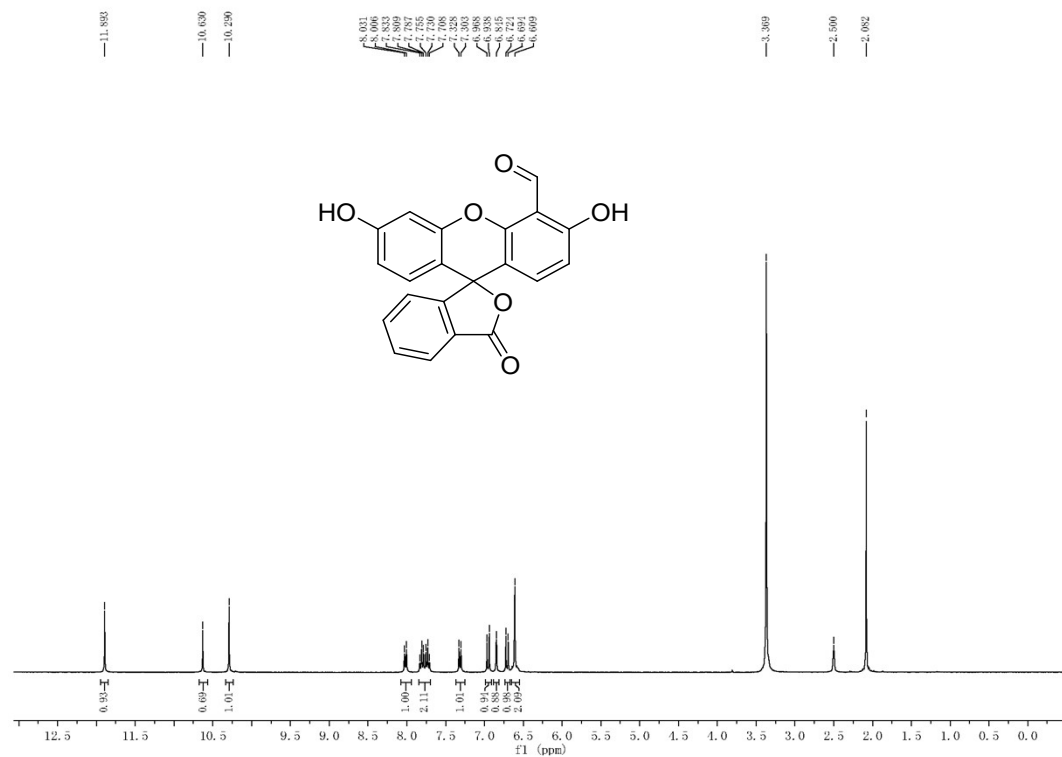

**Figure S3**  $^1\text{H}$  NMR spectrum (300 MHz,  $\text{DMSO-}d_6$ ) of monoaldehyde-functionalized fluorescein.

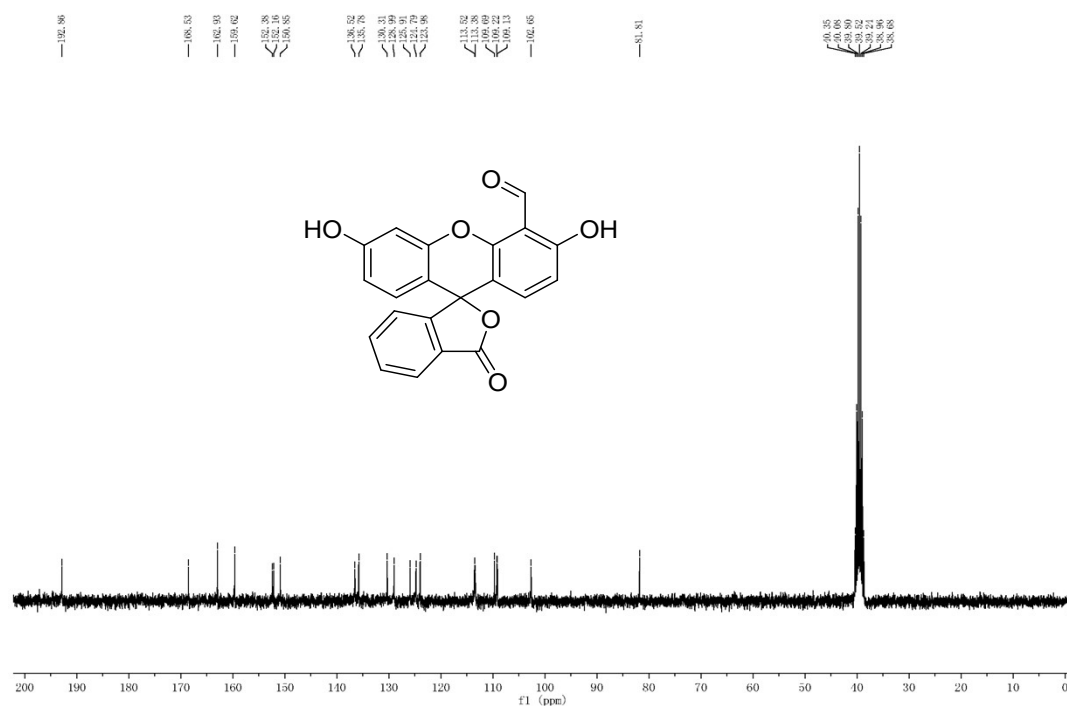

## Generic Display Report

### Analysis Info

Analysis Name D:\Data\Students\_MS\New Folder\ranff20151127-5.d  
Method LOWmass.m  
Sample Name default  
Comment

Acquisition Date 11/27/2015 11:16:45

Operator ESQ6K  
Instrument esquire6000

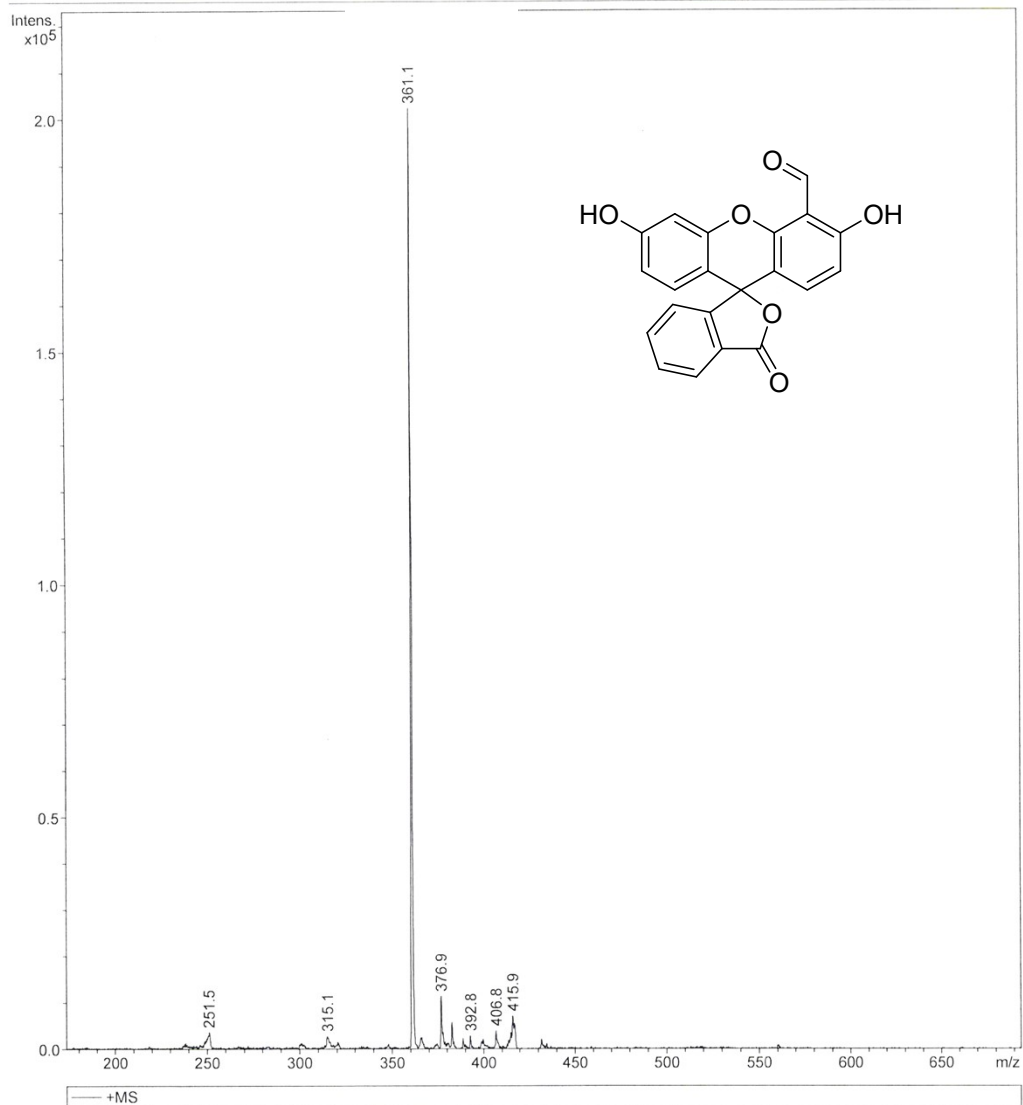

**Figure S5** ESI-MS spectrum of monoaldehyde-functionalized fluorescein.



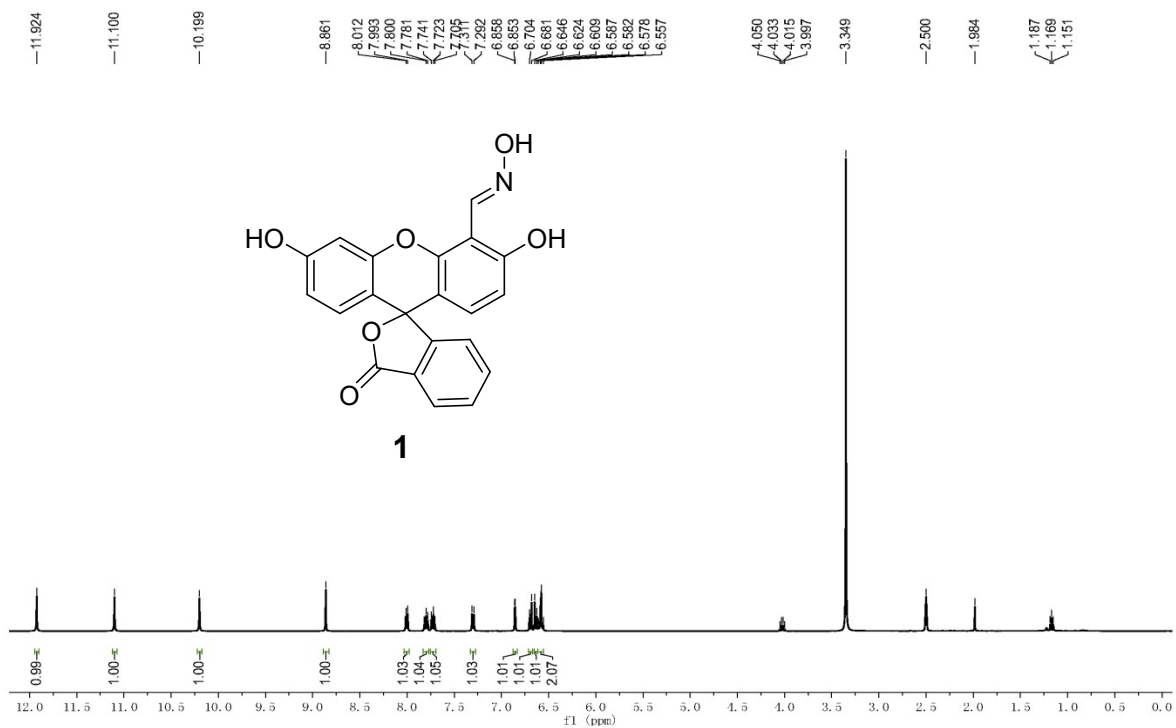

**Figure S6** <sup>1</sup>H NMR spectrum (400MHz, DMSO-*d*<sub>6</sub>) of **1**.

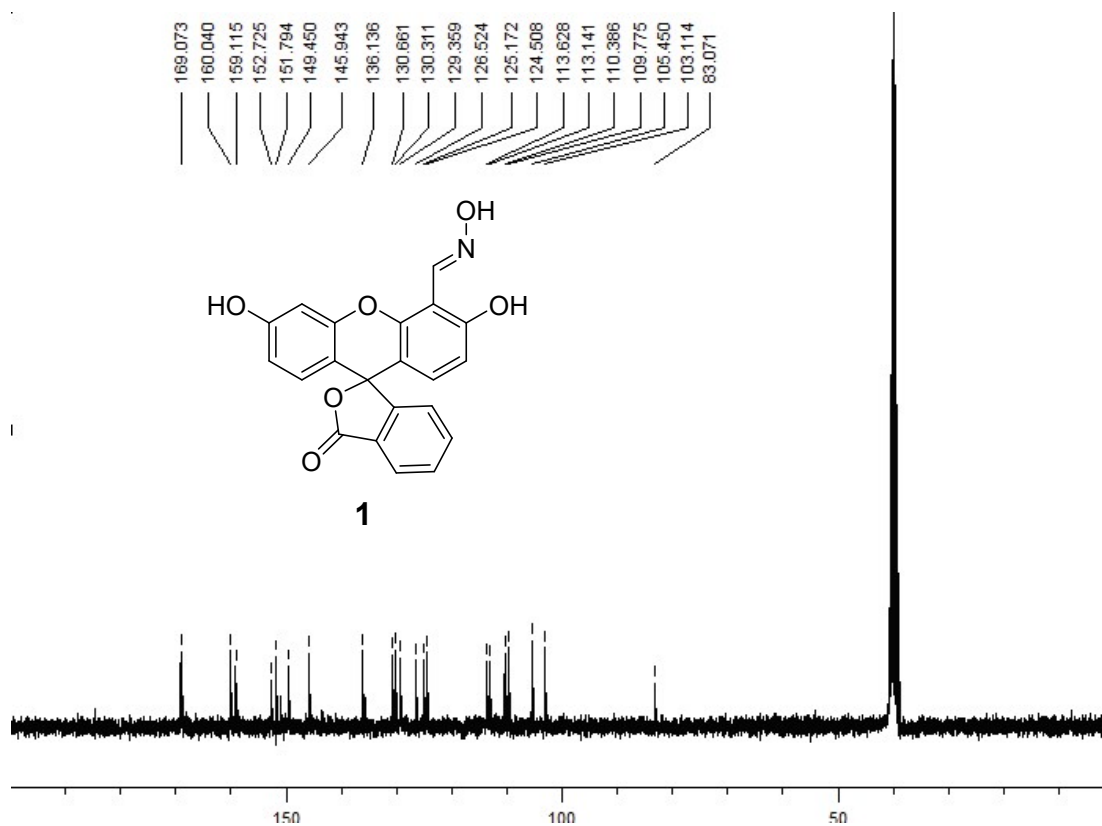

**Figure S7** <sup>13</sup>C NMR spectrum (400MHz, DMSO-*d*<sub>6</sub>) of **1**.

## Generic Display Report

### Analysis Info

Analysis Name D:\Data\Students\_MSI\New Folder\ranff20150402-4.d  
Method STUDENTS.m  
Sample Name default  
Comment

Acquisition Date 4/2/2015 10:27:15

Operator ESQ6K  
Instrument esquire6000

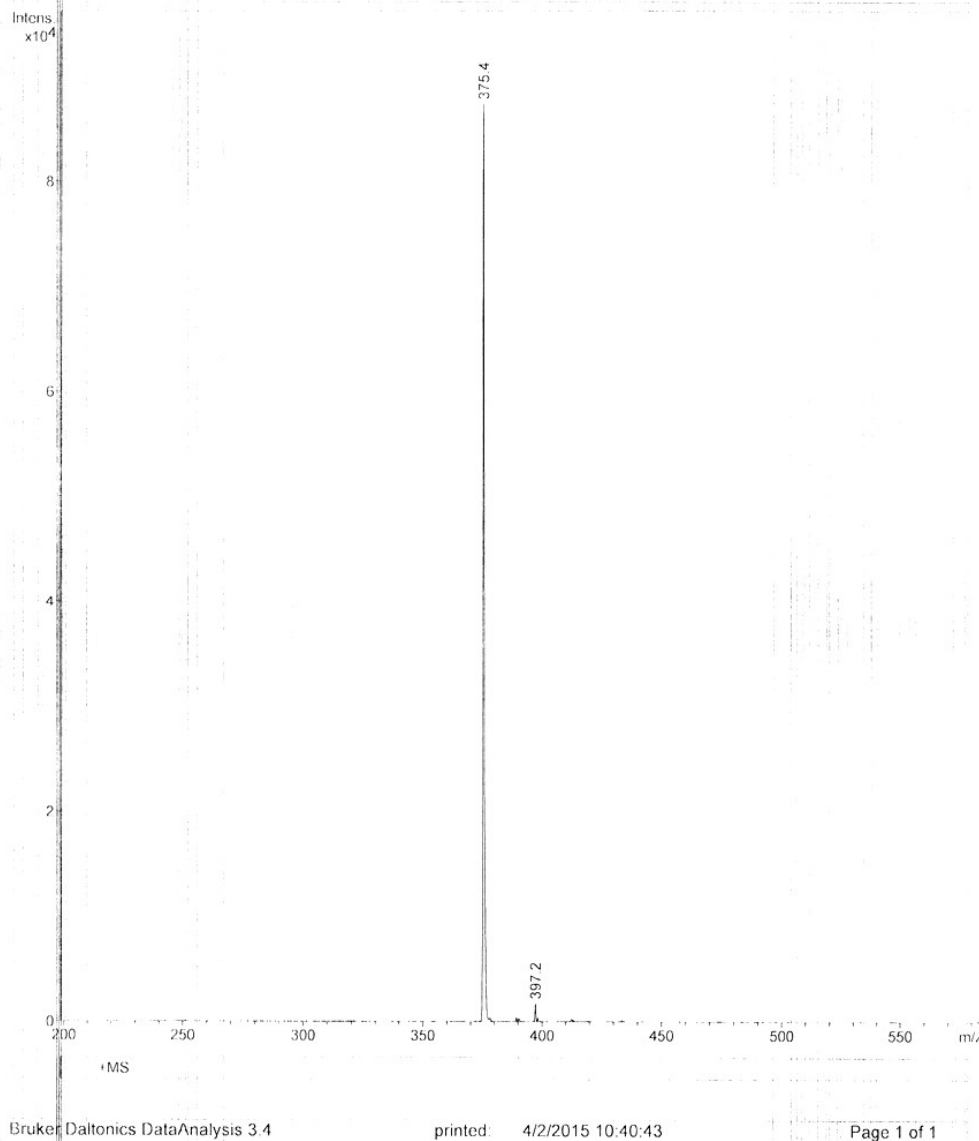

**Figure S8** ESI-MS spectrum of **1**.

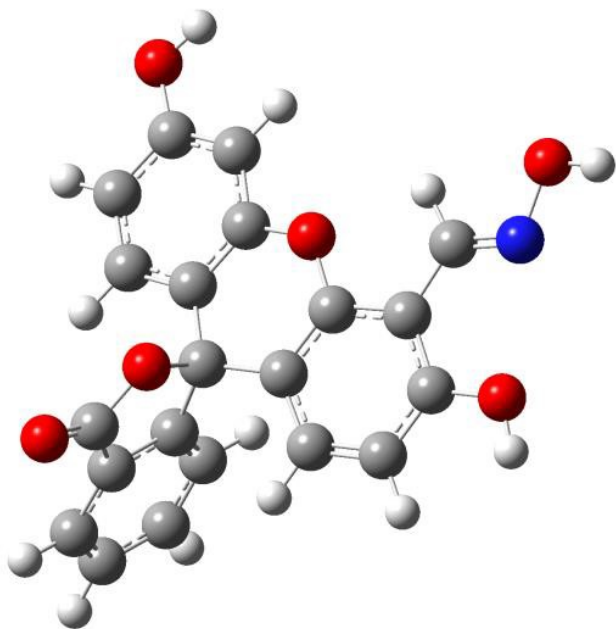

**Figure S9** Optimized structure of **1**.

B3LYP/6-31++g(d,p) scrf=pcm geom=connectivity

Charge = 0 Multiplicity = 1

|   |         |         |        |
|---|---------|---------|--------|
| C | -3.7908 | 0.4126  | 1.3787 |
| C | -3.7908 | -0.9733 | 1.3787 |
| C | -2.5906 | -1.6664 | 1.3907 |
| C | -1.3903 | -0.9734 | 1.4027 |
| C | -1.3903 | 0.4126  | 1.4027 |
| C | -2.5906 | 1.1056  | 1.3907 |
| C | -0.0566 | -1.7434 | 1.4027 |
| C | 1.0647  | -0.8293 | 1.9305 |
| C | 0.8059  | 0.5081  | 2.1862 |
| O | -0.1692 | 1.1176  | 1.4027 |
| C | 2.3297  | -1.3467 | 2.161  |
| C | 3.3358  | -0.5267 | 2.6473 |
| C | 3.132   | 0.8681  | 2.6583 |
| C | 1.8395  | 1.3568  | 2.5501 |

|   |         |         |         |
|---|---------|---------|---------|
| O | -5.0119 | 1.1176  | 1.3787  |
| O | 4.2301  | 1.7425  | 2.5259  |
| C | 1.5497  | 2.8398  | 2.8471  |
| O | 2.2294  | 4.8686  | 3.4274  |
| N | 2.4771  | 3.6013  | 3.1736  |
| O | -0.2115 | -2.9529 | 2.1106  |
| C | -0.0335 | -4.2268 | 1.2263  |
| C | 0.291   | -3.5741 | -0.1303 |
| C | 0.2782  | -2.1917 | -0.0321 |
| C | 0.5852  | -4.1801 | -1.3416 |
| C | 0.8666  | -3.4036 | -2.4547 |
| C | 0.8034  | -2.0209 | -2.3684 |
| C | 0.5344  | -1.4151 | -1.1512 |
| O | -0.0714 | -5.4388 | 1.2335  |
| H | -4.7623 | -1.5343 | 1.3592  |
| H | -2.5905 | -2.7883 | 1.3809  |
| H | -2.5905 | 2.2276  | 1.3809  |
| H | 2.5418  | -2.4271 | 1.9449  |
| H | 4.2031  | -0.9716 | 3.2029  |
| H | -5.0649 | 1.6881  | 2.1885  |
| H | 5.0649  | 1.2143  | 2.4356  |
| H | 0.5004  | 3.2311  | 2.7783  |
| H | 2.7465  | 5.4388  | 2.8017  |
| H | 0.5862  | -5.2991 | -1.4235 |
| H | 1.136   | -3.8936 | -3.4274 |
| H | 0.9604  | -1.3935 | -3.2852 |
| H | 0.5145  | -0.2959 | -1.0738 |

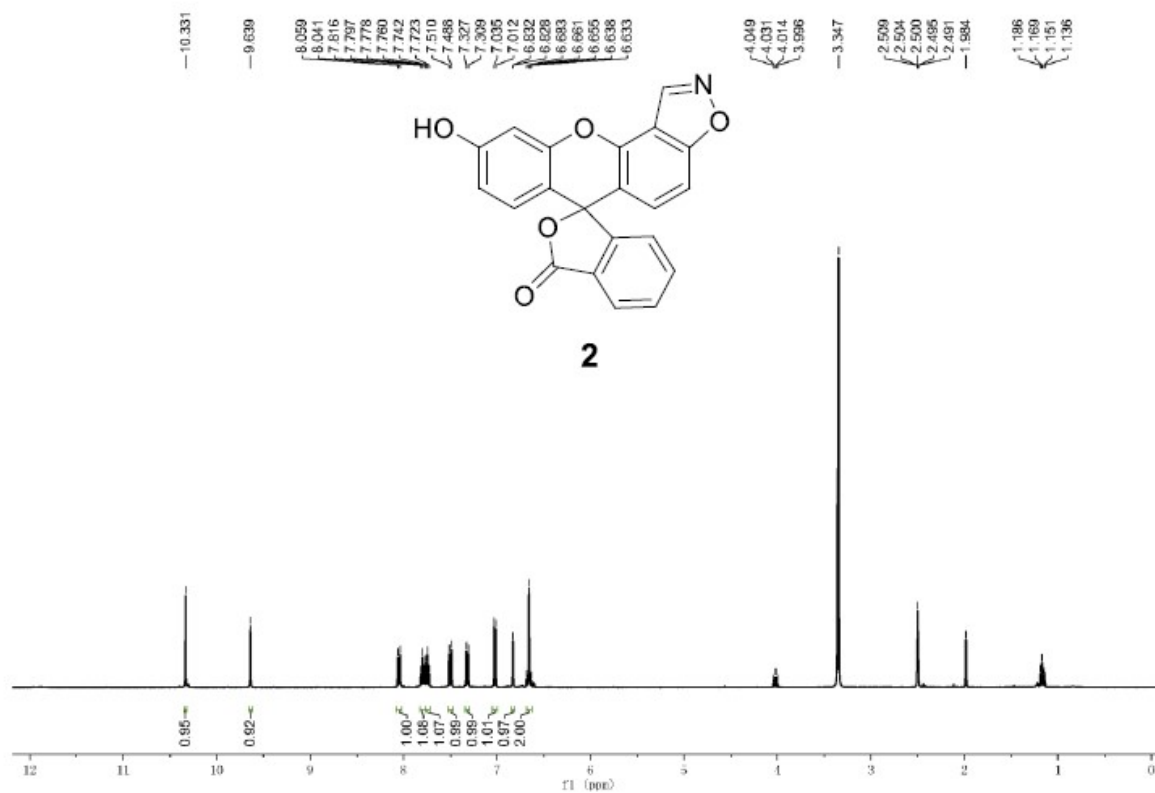

**Figure S10** <sup>1</sup>H NMR spectrum (400MHz, DMSO-*d*<sub>6</sub>) of **2**.

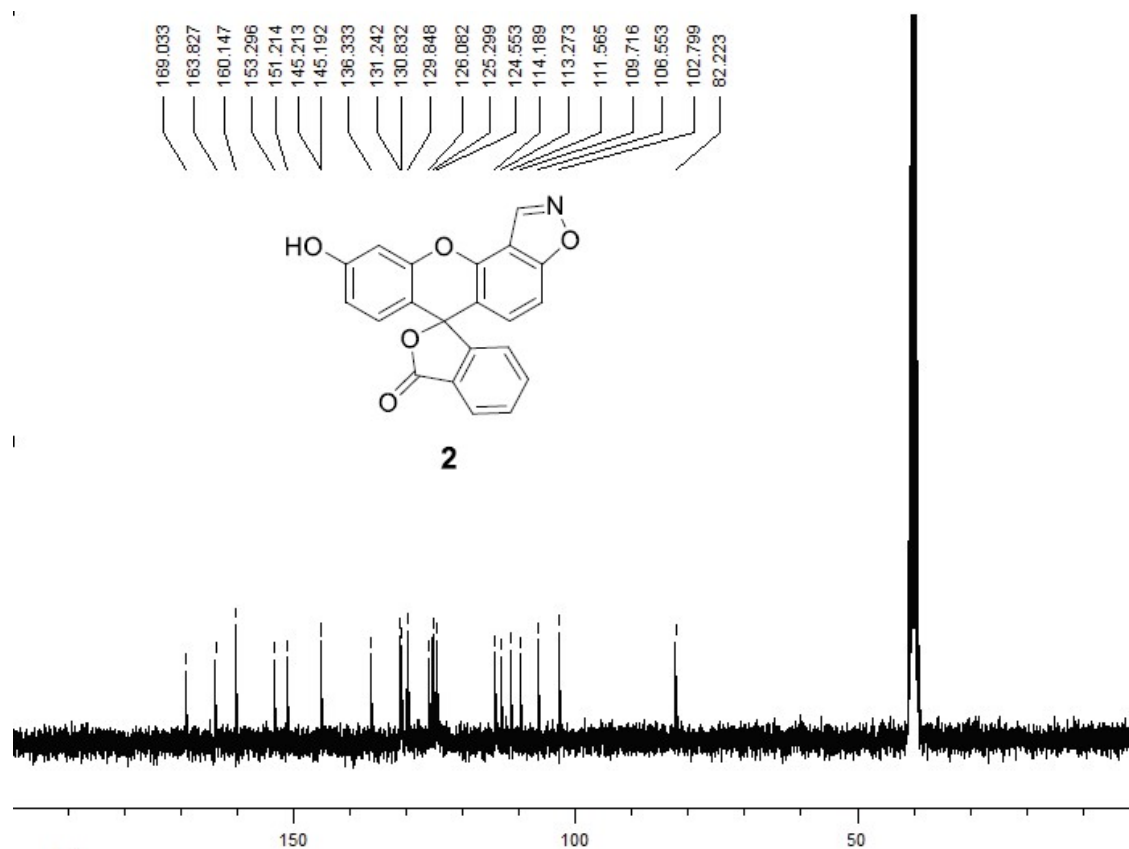

**Figure S11**  $^{13}\text{C}$  NMR spectrum (400MHz,  $\text{DMSO}-d_6$ ) of **2**.

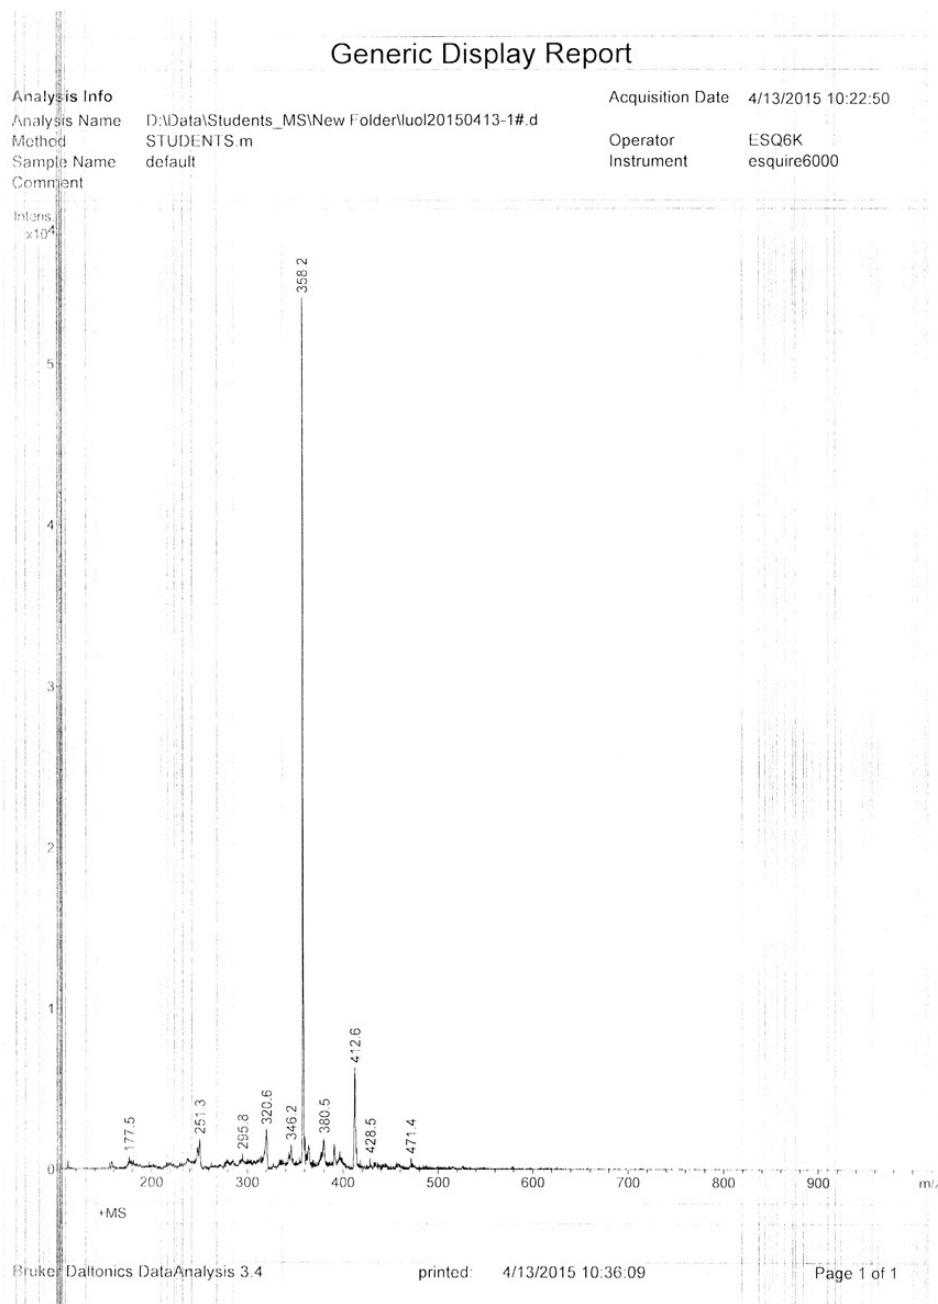

**Figure S12** ESI-MS spectrum of **2**.



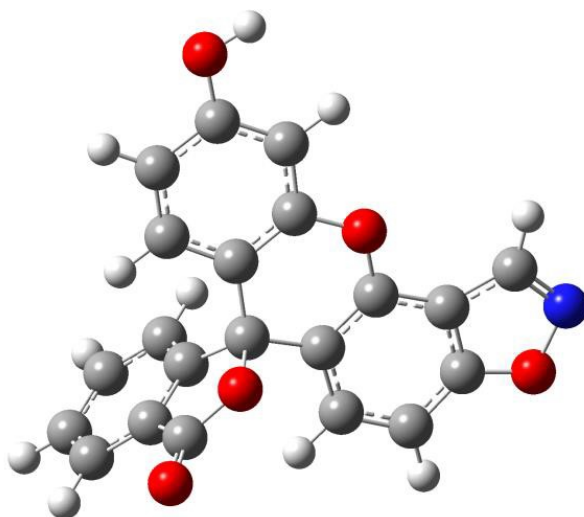

**Figure S13** Optimized structure of **2**.

B3LYP/6-31++g(d,p) scrf=pcm geom=connectivity

Charge = 0, Multiplicity = 1

|   |          |          |          |
|---|----------|----------|----------|
| C | -1.06354 | 4.04332  | -0.13211 |
| C | -2.2045  | 3.22709  | -0.1158  |
| C | -2.05505 | 1.85041  | -0.03072 |
| C | -0.78745 | 1.24062  | 0.03675  |
| C | 0.32672  | 2.08765  | 0.0171   |
| C | 0.20872  | 3.47687  | -0.05804 |
| C | -0.62862 | -0.24523 | 0.24164  |
| C | 0.80887  | -0.68029 | 0.05421  |
| C | 1.82316  | 0.27258  | 0.02365  |
| O | 1.61403  | 1.61428  | 0.04046  |
| C | 1.15643  | -2.05735 | 0.00758  |
| C | 2.46771  | -2.50814 | -0.0675  |
| C | 3.4458   | -1.51336 | -0.09515 |
| C | 3.16479  | -0.15426 | -0.05236 |
| O | -1.26956 | 5.38457  | -0.24295 |
| O | 4.79493  | -1.69063 | -0.1772  |

|   |          |          |          |
|---|----------|----------|----------|
| C | 4.44942  | 0.44447  | -0.1174  |
| N | 5.40698  | -0.44902 | -0.18786 |
| O | -0.9812  | -0.53675 | 1.68597  |
| C | -2.02323 | -1.39066 | 1.78111  |
| C | -2.4592  | -1.75679 | 0.41856  |
| C | -1.64638 | -1.09385 | -0.49658 |
| C | -3.49095 | -2.6044  | 0.01116  |
| C | -3.68435 | -2.77516 | -1.36068 |
| C | -2.86126 | -2.1103  | -2.28708 |
| C | -1.83124 | -1.26056 | -1.86633 |
| O | -2.41551 | -1.80624 | 2.85597  |
| H | -3.18615 | 3.68508  | -0.10789 |
| H | -2.94155 | 1.22726  | -0.01262 |
| H | 1.10586  | 4.0864   | -0.04868 |
| H | 0.35615  | -2.78741 | 0.034    |
| H | 2.71718  | -3.56033 | -0.10093 |
| H | -0.43285 | 5.8681   | -0.19135 |
| H | 4.71658  | 1.49105  | -0.11268 |
| H | -4.114   | -3.11158 | 0.73951  |
| H | -4.47775 | -3.42235 | -1.71721 |
| H | -3.0251  | -2.26119 | -3.34848 |
| H | -1.2039  | -0.74962 | -2.58858 |

**Table S1** Crystal data and structure refinement parameters for **2**

| Compound                               | Compound <b>2</b>                                             |
|----------------------------------------|---------------------------------------------------------------|
| Empirical formula                      | C <sub>24</sub> H <sub>17</sub> NO <sub>6</sub>               |
| Formula weight                         | 415.39                                                        |
| Temperature/K                          | 173                                                           |
| Crystal system                         | monoclinic                                                    |
| Space group                            | P2/c                                                          |
| a/Å                                    | 24.892(2)                                                     |
| b/Å                                    | 7.5673(5)                                                     |
| c/Å                                    | 23.691(2)                                                     |
| $\alpha$ /°                            | 90.00                                                         |
| $\beta$ /°                             | 118.281(12)                                                   |
| $\gamma$ /°                            | 90.00                                                         |
| Volume/Å <sup>3</sup>                  | 3930.0(6)                                                     |
| Z                                      | 8                                                             |
| $\rho_{\text{calc}}$ /cm <sup>3</sup>  | 1.404                                                         |
| $\mu$ /mm <sup>-1</sup>                | 0.102                                                         |
| F(000)                                 | 1728.0                                                        |
| Crystal size/mm <sup>3</sup>           | 0.34 × 0.33 × 0.25                                            |
| Radiation                              | MoK $\alpha$ ( $\lambda$ = 0.71073)                           |
| 2 $\Theta$ range for data collection/° | 6.54 to 52.04                                                 |
| Index ranges                           | -30 ≤ h ≤ 30, -9 ≤ k ≤ 9, -29 ≤ l ≤ 29                        |
| Reflections collected                  | 16011                                                         |
| Independent reflections                | 7627 [R <sub>int</sub> = 0.0718, R <sub>sigma</sub> = 0.1223] |
| Data/restraints/parameters             | 7627/0/565                                                    |
| Goodness-of-fit on F <sup>2</sup>      | 1.050                                                         |

## Limit of Detection (LOD).

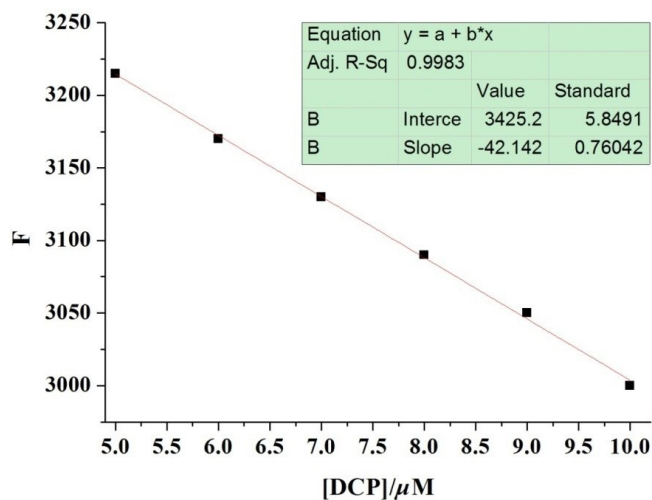

**Figure S14** Fluorometric determination of limit of DCP to probe in DMF/HEPES buffer (1/1, v/v, pH 7).

Slope = 42

Standard Deviation = 2.51

K = 3

$$\text{LOD} = K \times \text{Standard Deviation} / \text{Slope} = 3 \times 2.51 / 42 = 0.18 \mu\text{M}$$

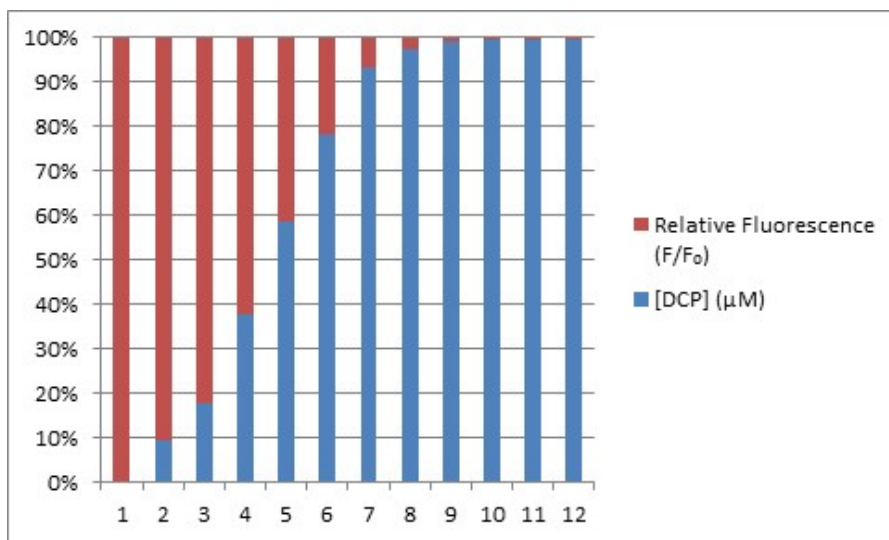

**Fig. S15** Titration curve showing the fluorescence quenching of probe (10  $\mu\text{M}$ ) with increasing concentrations of DCP (0.1  $\mu\text{M}$  – 50  $\mu\text{M}$ ) in DMF/HEPES buffer (1:1, v/v, pH 7.0).

## pH Effect

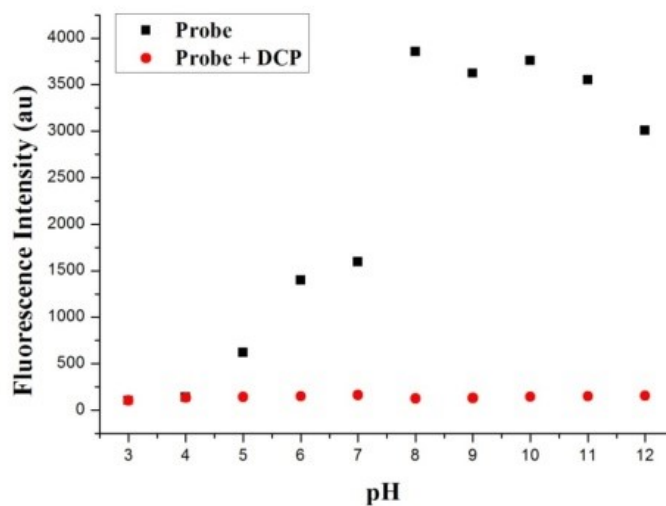

**Figure S16** The fluorescence intensity of probe ( $10.0 \mu\text{M}$ ) at 543 nm in the presence and absence of DCP ( $10.0 \mu\text{M}$ ) in DMF/HEPES buffer (1/1, v/v, pH 7.0) under different pH (3.0-12.0).

## Effect of HCl on UV/Fluorescence Spectra

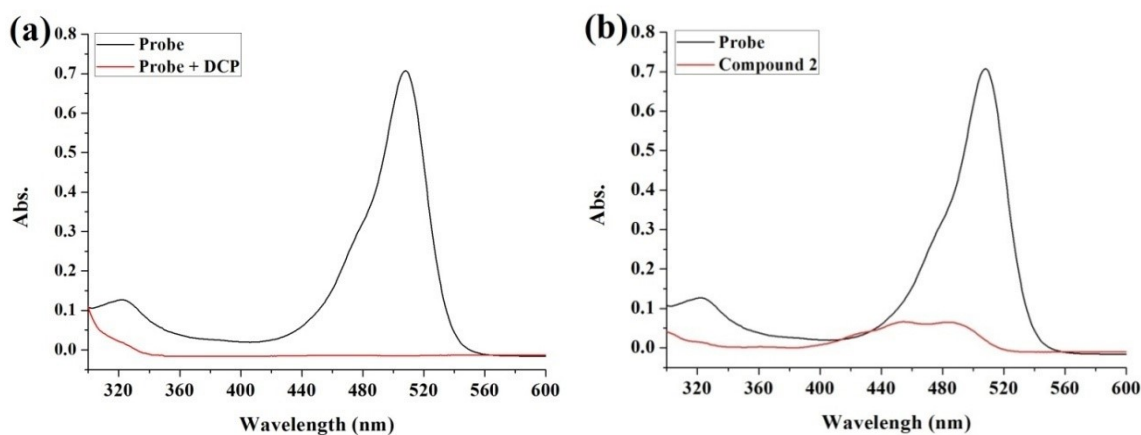

**Figure S17** UV spectra in the presence of HCl, (a) Probe ( $10.0 \mu\text{M}$ ) free and after addition of DCP ( $10.0 \mu\text{M}$ ) in DMF/HEPES buffer (1/1, v/v, pH 7.0) and (b) probe ( $10.0 \mu\text{M}$ ) and compound 2 ( $10.0 \mu\text{M}$ ) in DMF/HEPES buffer (1/1, v/v, pH 7.0).

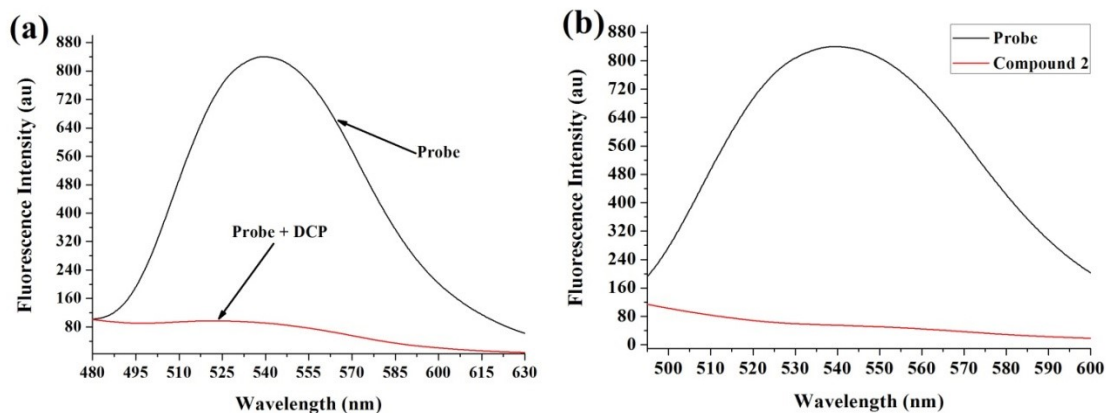

**Figure S18** Fluorescence spectra in the presence of HCl, (a) Probe ( $10.0\ \mu\text{M}$ ) free and after addition of DCP ( $10.0\ \mu\text{M}$ ) in DMF/HEPES buffer (1/1, v/v, pH 7.0) and (b) probe ( $10.0\ \mu\text{M}$ ) and compound 2 ( $10.0\ \mu\text{M}$ ) in DMF/HEPES buffer (1/1, v/v, pH 7.0).

## Applications

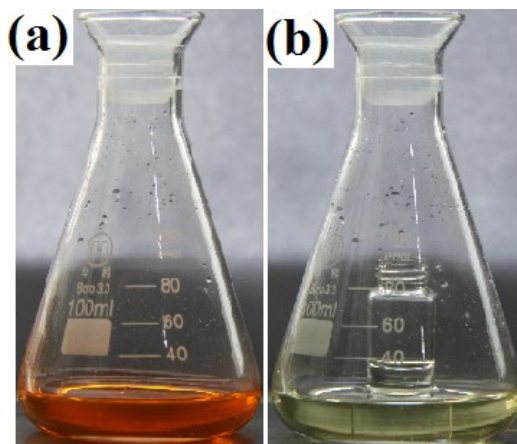

**Figure S19** Images of (a) free probe ( $10.0\ \mu\text{M}$ ), and (b) after exposure to DCP ( $15.0\ \mu\text{M}$ ) vapors in DMF/HEPES buffer (1/1, v/v, pH 7.0).

## Crystalline Structure

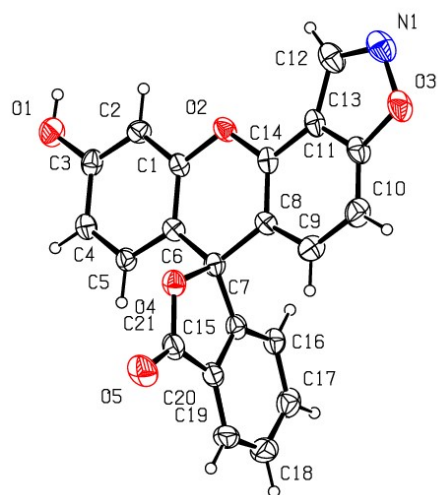

**Figure S20** View of the molecular structure of **2**.

## DFT Calculations

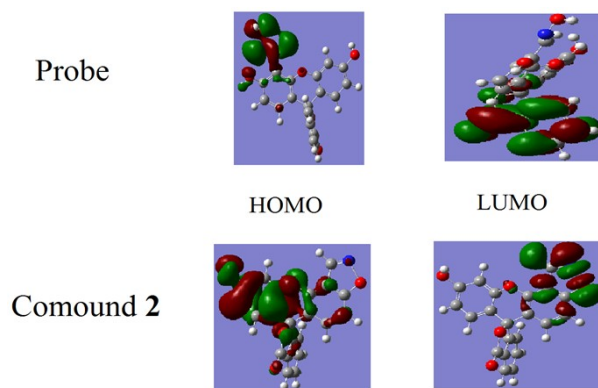

**Figure S21** HOMO-LUMO orbital plots of **1** and **2**.

**Table S2** A comparative analysis of critical performance metrics limit of detection (LOD), response rapidity, and selectivity for various fluorescent and colorimetric probes targeting nerve agent mimics.

| Study                                  | Detection Method                      | Target Agent(s)     | LOD / Sensitivity                         | Response Time                             | Selectivity                                         | Application Format            |
|----------------------------------------|---------------------------------------|---------------------|-------------------------------------------|-------------------------------------------|-----------------------------------------------------|-------------------------------|
| <b>This Work</b>                       | Fluorescence quenching + colorimetric | G-agent mimic       | 0.18 $\mu$ M                              | Seconds (naked-eye color change in <30 s) | High for DCP over other OPs                         | Liquid & vapor phase          |
| <b>Termeau et al.</b> <sup>4</sup>     | Colorimetric                          | Novichok agents     | ~10–50 equiv. in liquid; visual detection | Minutes to 1 hour                         | Selective for Novichok over G/V agents              | Glass fiber strips            |
| <b>Costero et al.</b> <sup>5</sup>     | Colorimetric                          | DCP, DFP, DCNP      | $\sim 1 \times 10^{-4}$ M                 | 3.5–11.4 s (half-life)                    | Selective for phosphonate ester mimics              | Silica gel support & solution |
| <b>Urban et al.</b> <sup>6</sup>       | Colorimetric                          | Novichok & V-agents | ~1% (v/v) liquid; ~4–9 mM for some agents | Immediate (color spots in <5 min)         | Distinguishes A- vs. V-group; some cross-reactivity | Paper strips                  |
| <b>Santonocito et al.</b> <sup>7</sup> | Fluorescence                          | DMMP                | 0.1 ppm (gas)                             | 1 hour exposure at 50°C                   | High via PCA fingerprinting                         | RP18 silica array             |



## References

1. Z.-H. Fu, X. Han, Y. Shao, J. Fang, Z.-H. Zhang, Y.-W. Wang and Y. Peng, *Anal. Chem.* 2017, **89**, 1937–1944.
2. W. Wang, O. Rusin, X. Xu, K. K. Kim, J. O. Escobedo, S. O. Fakayode, K. A. Fletcher, M. Lowry, C. M. Schowalter, C. M. Lawrence, F. R. Fronczek, I. M. Warner and R. M. Strongin, *J. Am. Chem. Soc.* 2005, 127, 15949-15958.
3. H. Lee and H. -J. Kim, *Tetrahedron*, 2014, 70, 2966-2970.
4. L. Termeau, S. Penlou, and A. Carella, *ACS Sensors*, 2023, 8, 1510-1517.
5. M. Costero, S. Gil, M. Parra, P. M. E. Mancini, R. M. Manez, F. Sancenon and S. Royo, *Chem. Commun.*, 2008, 6002–6004.
6. M. Urban, T. Dropa, M. Zelenkova, M. Dymak and V. Pitschmann, *Chemosensors*, 2025, 13, 77.
7. R. Santonocito, M. Spina, R. Puglisi, A. Pappalardo, N. Tuccitto and G. T. Sfrazzetto, *Chemosensors*, 2023, 11, 503.
